# Supplementary material for: Lipotoxicity-Induced PRMT1 Exacerbates Mesangial Cell Apoptosis via Endoplasmic Reticulum Stress
Source: MDPI journal article supplement (doi:10.3390/ijms18071421), 2017-07-03
Supplement: s1 [file s1]

## Supplementary information

### Co-immunoprecipitation analysis

Mesangial cells were lysed in non-denaturing lysis buffer (25mM Tris [pH 7.4], 150mM NaCl, 1% NP-40, 1mM EDTA, 5% glycerol, and protease inhibitor mixture). 800  $\mu$ g of protein was incubated with PRMT1 antibody (Bethyl Laboratories, A300-722A) or rabbit IgG (Cell Signaling Technology, #2729) overnight at 4 °C, followed by incubation with Protein A-Agarose beads (Santa Cruz Biotechnology, sc-2001) for 4 h. The beads were washed five times with lysis buffer and boiled in loading buffer to elute bound proteins. Eluted proteins were analyzed by Western blotting. FOXO1 antibody (#2880) were purchased from Cell Signaling Technology and BAD antibody (ab32445) were purchased from Abcam.

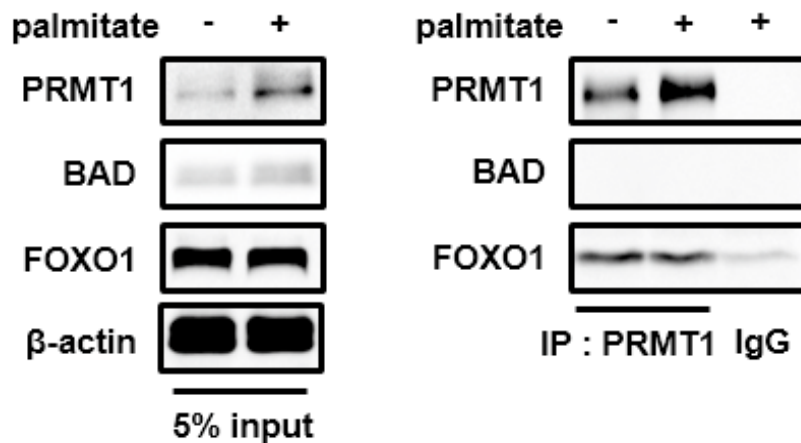

**Figure S1.** Mesangial cells were treated with 30  $\mu$ M palmitate for 12 h. cell extracts were subjected to immunoprecipitation analysis with PRMT1 antibody as described in supplementary information. The representative immunoblots were from at least three independent experiments.
